# Supplementary material for: The positive efficacy of dexmedetomidine on the clinical outcomes of patients undergoing renal transplantation: evidence from meta-analysis
Source: Aging (Albany NY). 2023 Dec 11;15(23):14192–209. doi: 10.18632/aging.205296 (PMC10756127; doi:10.18632/aging.205296)
Supplement: Supplementary Figures [file aging-15-205296-s001.pdf]

SUPPLEMENTARY FIGURES

|                    | Random sequence generation (selection bias) | Allocation concealment (selection bias) | Blinding of participants and personnel (performance bias) | Blinding of outcome assessment (detection bias) | Incomplete outcome data (attrition bias) | Selective reporting (reporting bias) | Other bias |
|--------------------|---------------------------------------------|-----------------------------------------|-----------------------------------------------------------|-------------------------------------------------|------------------------------------------|--------------------------------------|------------|
| Jin Ha Park 2021   | +                                           | +                                       | +                                                         | +                                               | +                                        | +                                    | +          |
| Peng Yang 2020     | +                                           | +                                       | +                                                         | +                                               | +                                        | +                                    | +          |
| Sunder Negi 2014   | +                                           | +                                       | +                                                         | +                                               | +                                        | +                                    | +          |
| Xi-sheng Shan 2022 | +                                           | +                                       | +                                                         | +                                               | +                                        | +                                    | +          |
| Yin-Chin Wang 2022 | +                                           | +                                       | +                                                         | -                                               | +                                        | +                                    | +          |
| Zhenzhen Liu 2022  | +                                           | +                                       | +                                                         | +                                               | +                                        | +                                    | +          |

| Cohort studies | Selection                                |                                     | Comparability                                                            |                                                                 | Outcome                                                     |                                  |
|----------------|------------------------------------------|-------------------------------------|--------------------------------------------------------------------------|-----------------------------------------------------------------|-------------------------------------------------------------|----------------------------------|
|                | Representativeness of the exposed cohort | Selection of the non exposed cohort | Demonstration that outcome of interest was not present at start of study | Comparability of cohorts on the basis of the design or analysis | Assessment of outcome was long enough for outcomes to occur | Adequacy of follow up of cohorts |
| Jun Chen ,2020 | *                                        | *                                   | *                                                                        | *                                                               | *                                                           | *                                |

Supplementary Figure 1. Quality evaluation results of the included studies.

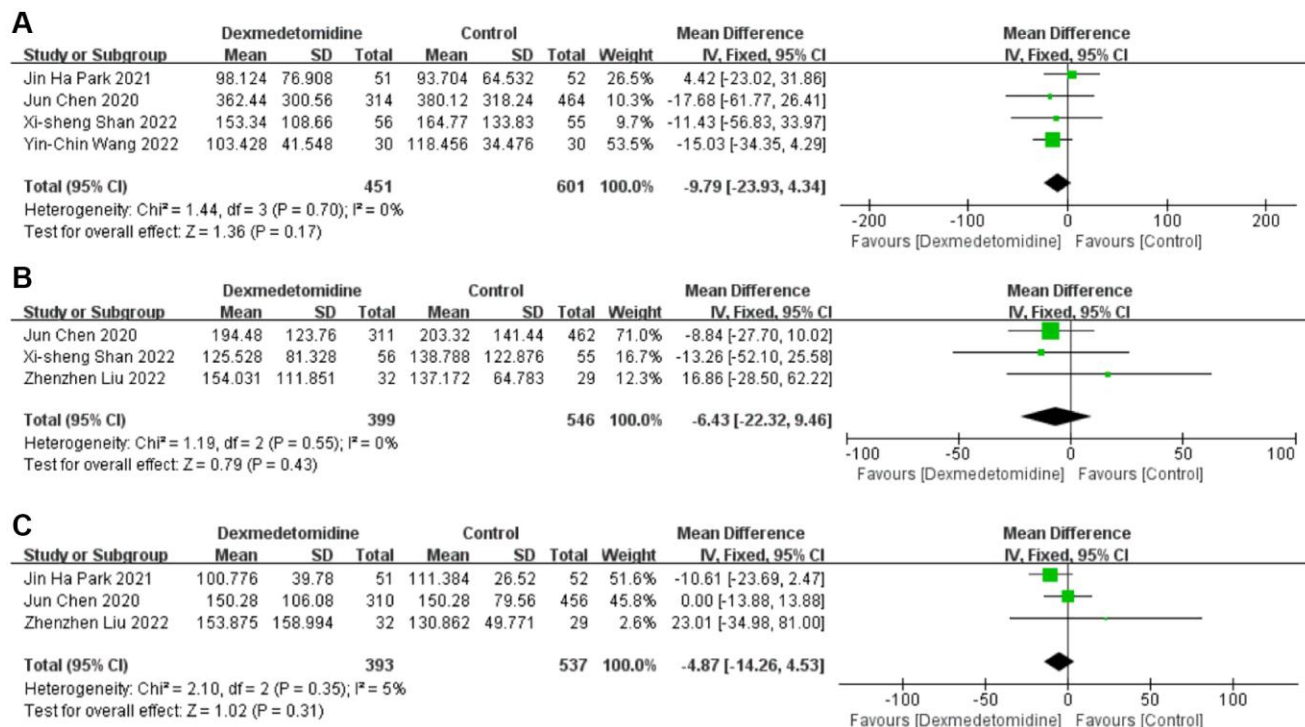

**Supplementary Figure 2.** Forest plots of the effect of DEX on creatinine level at 7 days (A), 1 month (B) and 3 months (C) after RT.

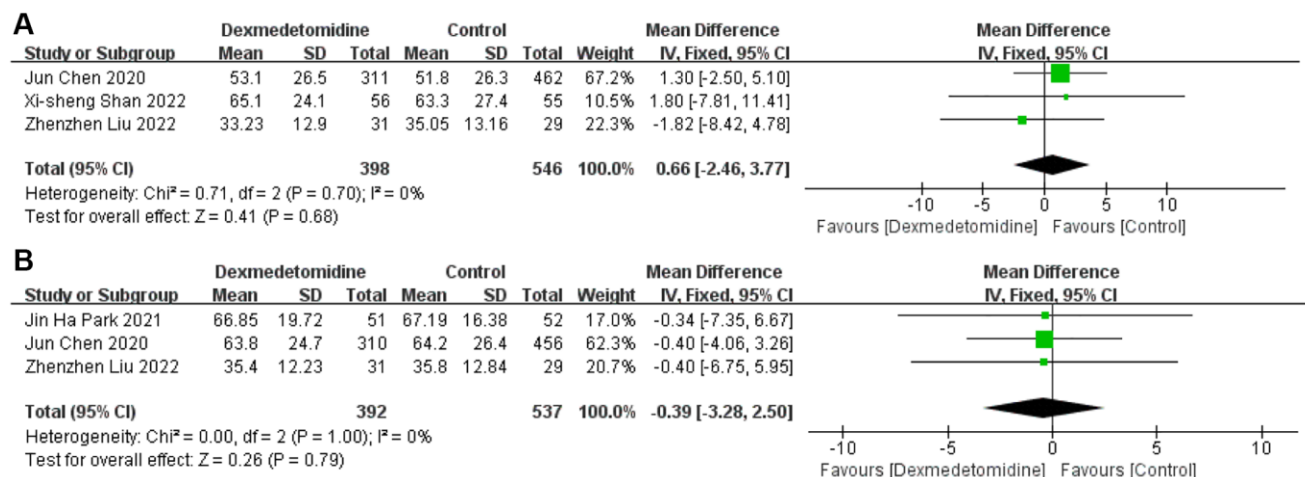

**Supplementary Figure 3.** Forest plots of the effect of DEX on eGFR at 1 month (A) and 3 months (B) after RT.
